# Supplementary material
Source: PubMed Central journal article supplement (PMC4141469)

Figure S1:

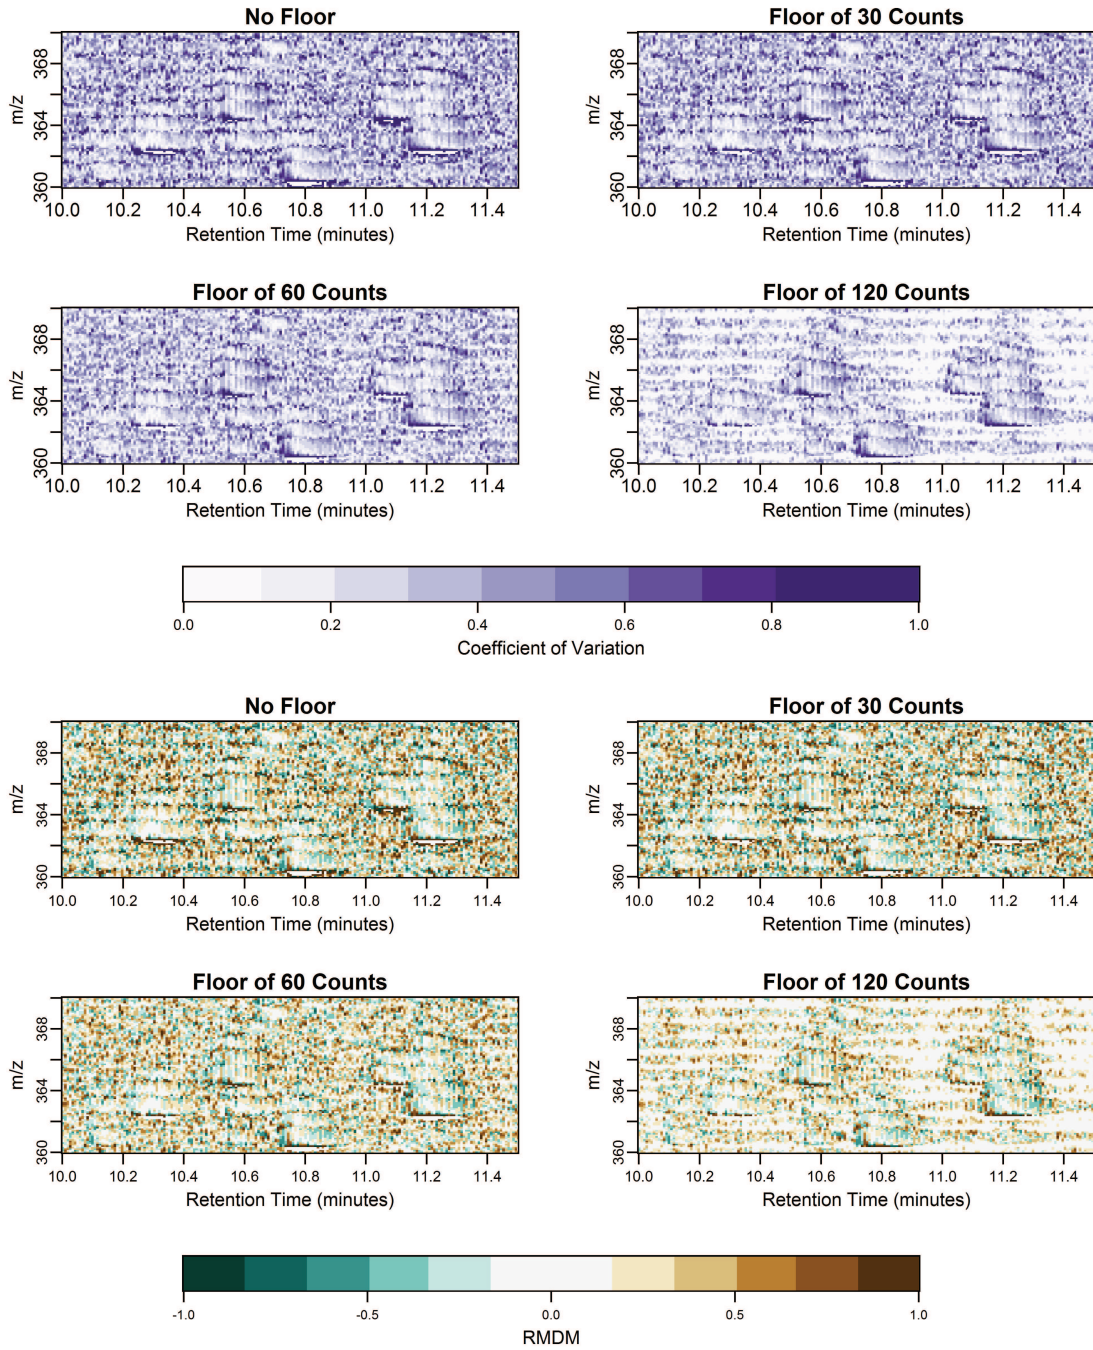

Supplement: NIHMS613530-supplement-2.pdf [file NIHMS613530-supplement-2.pdf]

Figure S2:

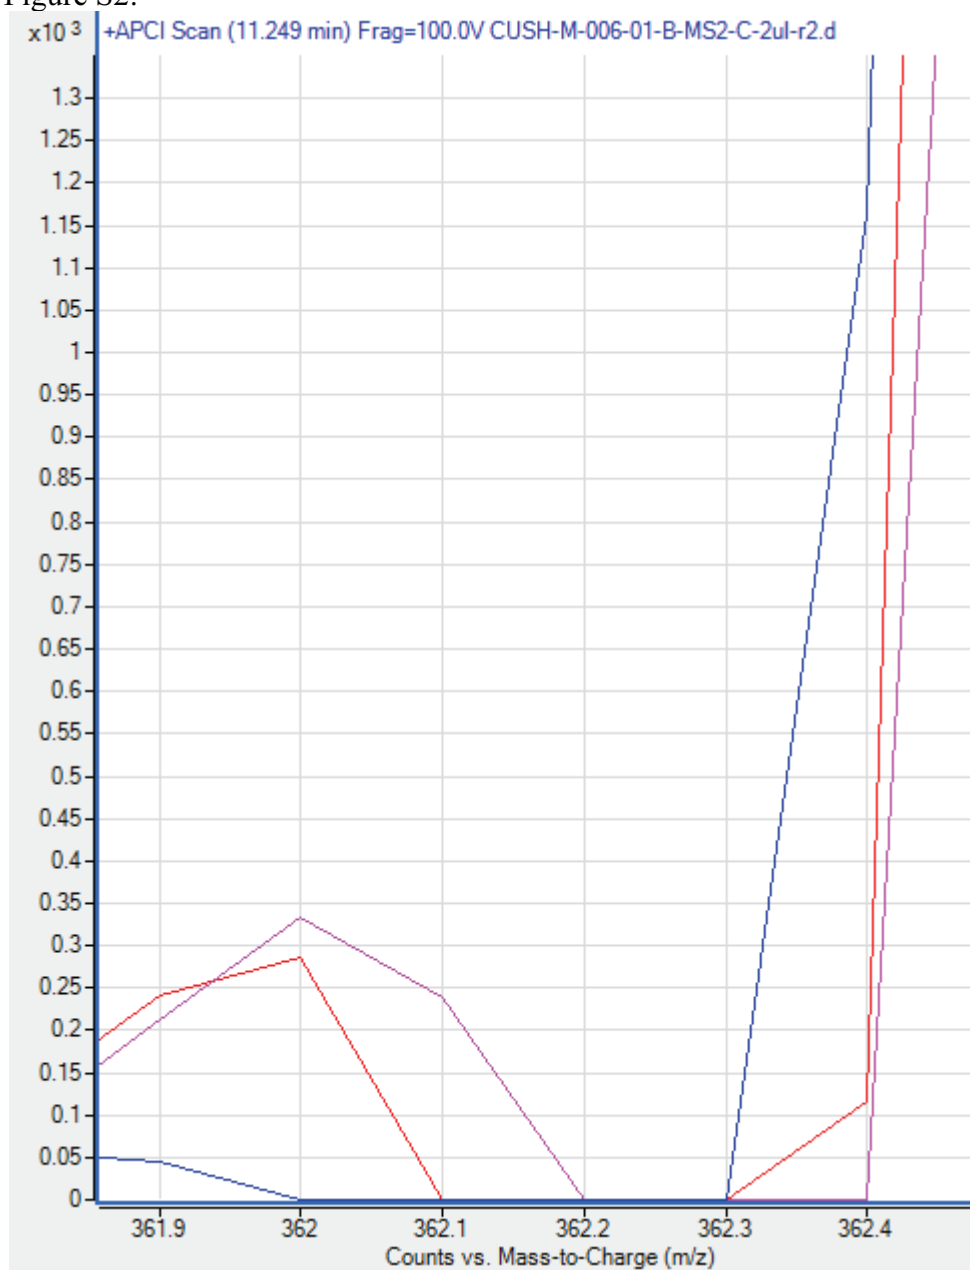

Supplement: NIHMS613530-supplement-3.pdf [file NIHMS613530-supplement-3.pdf]

Figure S3:

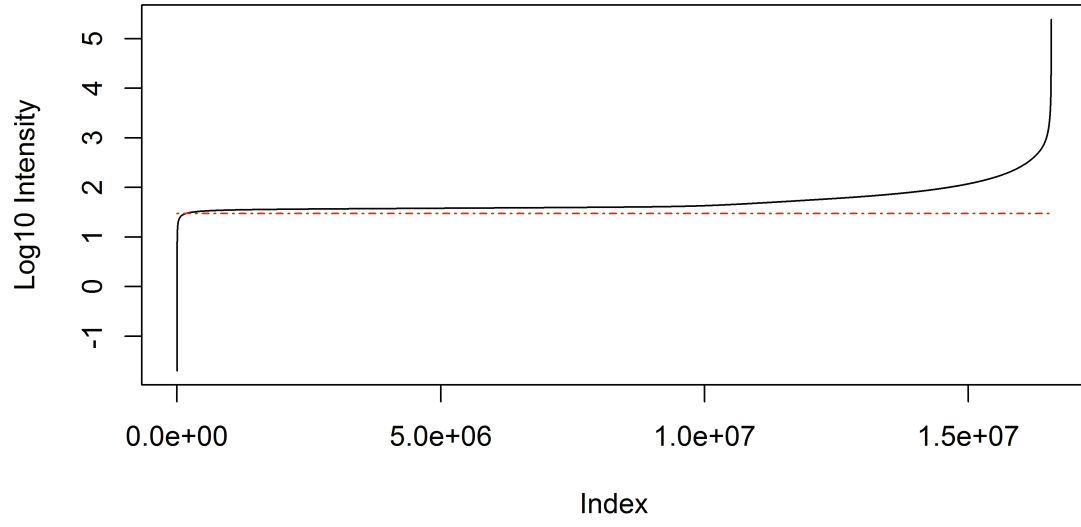

Supplement: NIHMS613530-supplement-4.pdf [file NIHMS613530-supplement-4.pdf]

Figure S4:

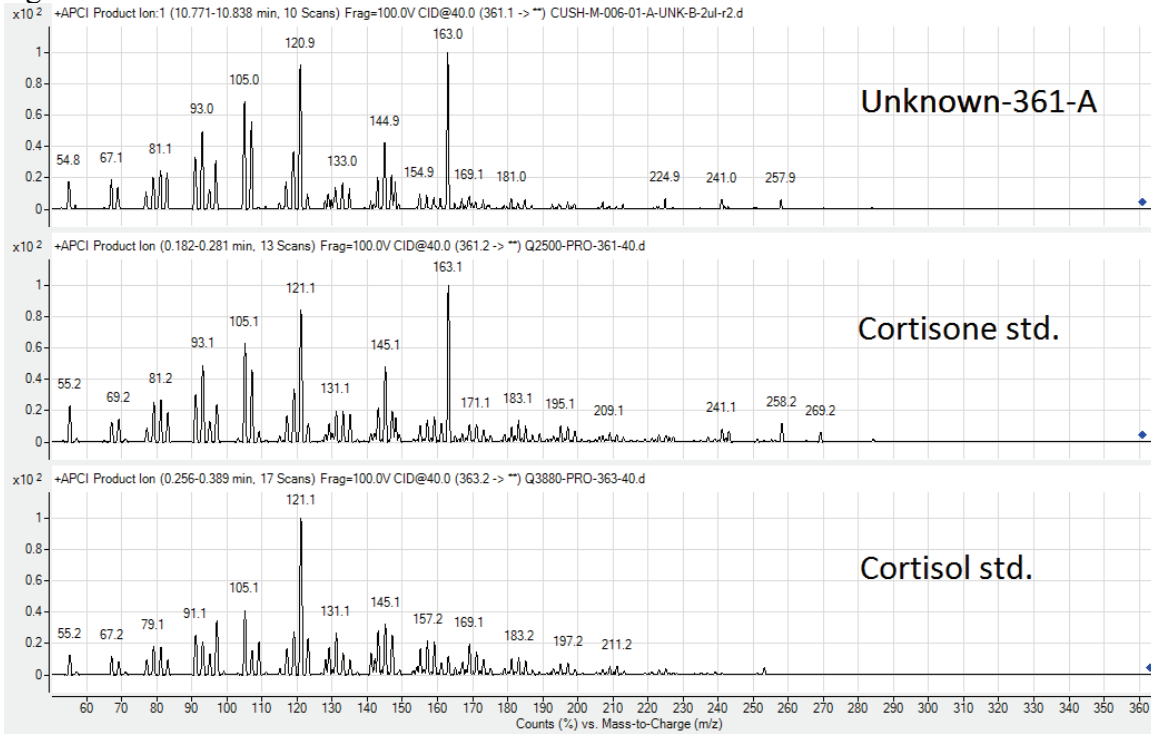

Supplement: NIHMS613530-supplement-5.pdf [file NIHMS613530-supplement-5.pdf]

Figure S5:

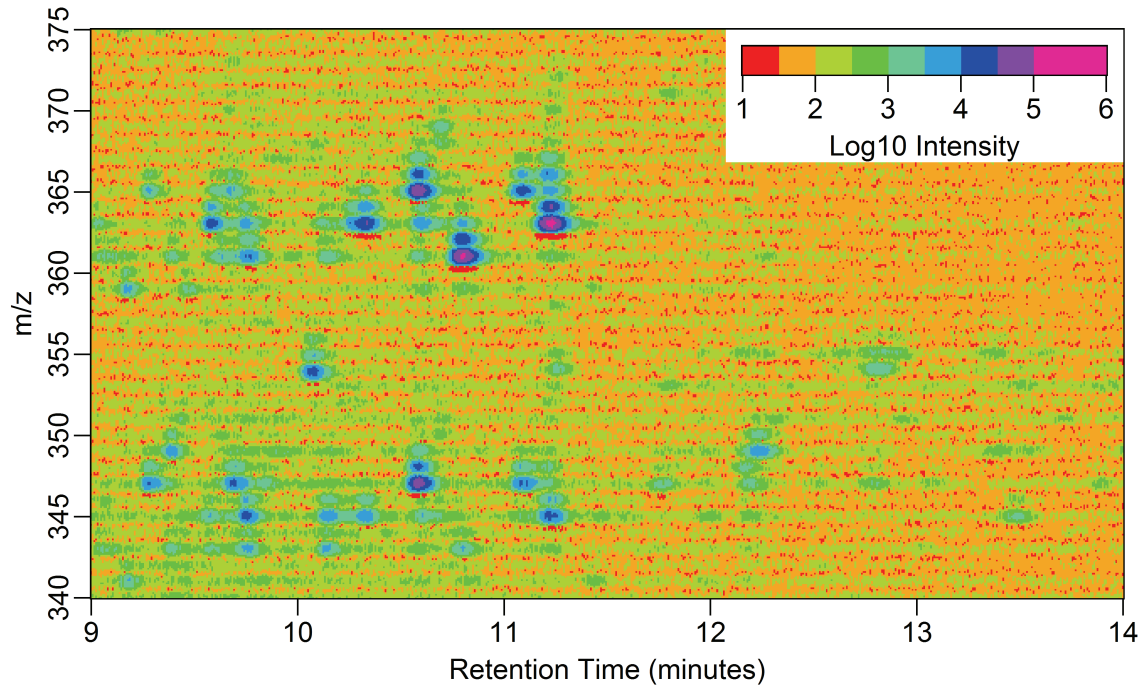

Supplement: NIHMS613530-supplement-6.pdf [file NIHMS613530-supplement-6.pdf]
